# Supplementary material for: Data-driven long-term glycaemic control trajectories and their associated health and economic outcomes in Finnish patients with incident type 2 diabetes
Source: PubMed Central journal article supplement (PMC9159579; doi:10.1371/journal.pone.0269245), 2022-06-01
Supplement: pone.0269245.s001.pdf [file pone.0269245.s001.pdf]

**S1 Table.** Definitions of micro- and macrovascular complications and numbers of outcome events by type of analysis (first event occurrence after type 2 diabetes diagnosis).

|                                                                       | ICD-10 code <sup>1</sup> or NOMESCO classification of surgical procedures code <sup>2</sup>    | No. of events in analyses of microvascular complications | No. of events in analyses of macrovascular complications | No. of events in analyses of micro- and macrovascular complications |
|-----------------------------------------------------------------------|------------------------------------------------------------------------------------------------|----------------------------------------------------------|----------------------------------------------------------|---------------------------------------------------------------------|
| <b>Microvascular complications</b>                                    |                                                                                                | <b>125</b>                                               |                                                          | <b>105</b>                                                          |
| <b>Eye complications</b>                                              |                                                                                                | <b>16</b>                                                |                                                          | <b>15</b>                                                           |
| Retinopathy or other diabetic eye complication                        | E11.3, H28.0, H36 (excluding H36.8), H40.5, H42.0, H43.1, H45.0                                | 14                                                       |                                                          | 14                                                                  |
| Blindness in one or two eyes                                          | H54                                                                                            | 2                                                        |                                                          | 1                                                                   |
| <b>Renal complications</b>                                            |                                                                                                | <b>34</b>                                                |                                                          | <b>27</b>                                                           |
| Renal insufficiency                                                   | E11.2, N08.3, N18                                                                              | 33                                                       |                                                          | 27                                                                  |
| End-stage renal disease (with or without dialysis)                    | Z49, Z94.0                                                                                     | 1                                                        |                                                          | 0                                                                   |
| <b>Neuropathic complications</b>                                      |                                                                                                | <b>75</b>                                                |                                                          | <b>63</b>                                                           |
| Diabetic neuropathy, Charcot foot or other diabetic foot complication | E11.4, E11.5, E11.6, G59.0, G63.2, G73.0, G99.0, I70.2, I73.9, I79.2, L97, M14.2, M14.6, N48.4 | 75                                                       |                                                          | 63                                                                  |
| Amputation of lower extremities                                       | NOMESCO:<br>NFQ10, NFQ20, NGQ10, NGQ20, NHQ10, NHQ20, NFQ48, NGQ48, NHQ30, NHQ40, NHQ60        | 0                                                        |                                                          | 0                                                                   |
| <b>Macrovascular complications</b>                                    |                                                                                                |                                                          | <b>237</b>                                               | <b>213</b>                                                          |
| <b>Cardiovascular complications</b>                                   |                                                                                                |                                                          | <b>211</b>                                               | <b>193</b>                                                          |
| Angina pectoris                                                       | I20                                                                                            |                                                          | 11                                                       | 9                                                                   |
| Chronic heart failure                                                 | I11.0, I13.0, I13.2, I50                                                                       |                                                          | 65                                                       | 59                                                                  |
| Incident myocardial infarction/cardiac arrest                         | I21, I46                                                                                       |                                                          | 20                                                       | 18                                                                  |

|                                      |                           |  |           |           |
|--------------------------------------|---------------------------|--|-----------|-----------|
| Other ischemic heart disease         | I22–I25                   |  | 115       | 107       |
| <b>Cerebrovascular complications</b> |                           |  | <b>26</b> | <b>20</b> |
| Ischemic stroke                      | I63–I66 (excluding I63.6) |  | 26        | 20        |

<sup>1</sup>WHO. International Statistical Classification of Diseases and Related Health Problems 10th revision. Available at: <http://apps.who.int/classifications/icd10/browse/2010/en>. Accessed 10 Oct 2019.

<sup>2</sup>Nordic Medico-Statistical Committee. NOMESCO Classification of Surgical Procedures (NCSP), version 1.15. Available at: <https://norden.diva-portal.org/smash/get/diva2:970547/FULLTEXT01.pdf>. Accessed 8 Jan 2019.
