# Supplementary material for: Data-driven long-term glycaemic control trajectories and their associated health and economic outcomes in Finnish patients with incident type 2 diabetes
Source: PubMed Central journal article supplement (PMC9159579; doi:10.1371/journal.pone.0269245), 2022-06-01
Supplement: pone.0269245.s002.pdf [file pone.0269245.s002.pdf]

**S2 Table.** Definitions of concordant and discordant diseases at baseline.

| <b>Concordant, T2D-coexisting diseases</b> | <b>ICD-10 code<sup>1</sup></b>       |
|--------------------------------------------|--------------------------------------|
| Hypertension                               | I10                                  |
| Coronary heart disease                     | I20–I25                              |
| Atrial fibrillation                        | I48                                  |
| Heart failure                              | I50, I11.0, I13.0, I13.2             |
| Peripheral arterial diseases               | I70.2, I73.9                         |
| Stroke (incl. Sah)                         | I60, I61, I63 (excluding I63.6), I64 |
| Chronic kidney disease                     | N18, N19                             |
| Neuropathies                               | G59, G63, G73, G99                   |
| Blindness                                  | H54                                  |
| Diabetes complications                     | E11.2–E11.8 sublevels                |
| <b>Discordant diseases</b>                 |                                      |
| Cancers                                    | C00–C43, C45–C97                     |
| Asthma                                     | J45, J46                             |
| Gout                                       | M10                                  |
| Glaucoma                                   | H40–H42                              |
| Depression                                 | F32, F33                             |
| Dementia                                   | F00–F03, G30                         |
| Mental diseases                            | F20–F48                              |
| Chronic obstructive pulmonary disease      | J43–J44                              |
| Rheumatoid and other arthritis             | M05–M13, M32, M33, M45               |
| Osteoporosis                               | M80–M85                              |
| Neuromuscular diseases                     | G70–G72                              |
| Liver diseases excluding cancers           | K70–K77                              |

<sup>1</sup>WHO. International Statistical Classification of Diseases and Related Health Problems 10th revision. Available at: <http://apps.who.int/classifications/icd10/browse/2010/en>. Accessed 10 Oct 2019.
