# Supplementary material for: Data-driven long-term glycaemic control trajectories and their associated health and economic outcomes in Finnish patients with incident type 2 diabetes
Source: PubMed Central journal article supplement (PMC9159579; doi:10.1371/journal.pone.0269245), 2022-06-01
Supplement: pone.0269245.s003.pdf [file pone.0269245.s003.pdf]

**S3 Table.** Unadjusted latent class growth analyses for HbA1c values measured annually since T2D diagnosis among patients diagnosed in 2011 or 2012 (n=1540).

| Model            | Log-likelihood | N of param | BIC      | Entropy | LMR-LRT <i>P</i> | BLRT <i>P</i> | <i>Min. APP</i> | <i>Class 1</i> | <i>Class 2</i> | <i>Class 3</i> | <i>Class 4</i> | <i>Class 5</i> |
|------------------|----------------|------------|----------|---------|------------------|---------------|-----------------|----------------|----------------|----------------|----------------|----------------|
| <b>Linear</b>    |                |            |          |         |                  |               |                 |                |                |                |                |                |
| 1-class          | -27 186.3      | 10         | 54 446.1 | NA      | NA               | NA            | NA              | 100.0          |                |                |                |                |
| 2-class          | -25 981.6      | 13         | 52 058.7 | 0.925   | 0.036            | <0.001        | 0.957           | 87.9           | 12.1           |                |                |                |
| 3-class          | -25 621.2      | 16         | 51 359.8 | 0.816   | 0.040            | <0.001        | 0.874           | 71.2           | 21.8           | 7.1            |                |                |
| 4-class          | -25 339.6      | 19         | 50 818.7 | 0.840   | 0.043            | <0.001        | 0.856           | 68.1           | 23.4           | 5.8            | 2.7            |                |
| 5-class          | -25 197.7      | 22         | 50 556.9 | 0.849   | 0.193            | <0.001        | 0.847           | 66.2           | 24.4           | 4.5            | 3.9            | 1.1            |
| <b>Quadratic</b> |                |            |          |         |                  |               |                 |                |                |                |                |                |
| 1-class          | -27 169.5      | 11         | 54 419.7 | NA      | NA               | NA            | NA              | 100.0          |                |                |                |                |
| 2-class          | -25 964.1      | 15         | 52 038.2 | 0.928   | 0.041            | <0.001        | 0.952           | 87.8           | 12.2           |                |                |                |
| 3-class          | -25 603.6      | 19         | 51 346.6 | 0.816   | 0.422            | <0.001        | 0.865           | 70.6           | 22.3           | 7.0            |                |                |
| 4-class          | -25 259.0      | 23         | 50 686.7 | 0.845   | 0.216            | <0.001        | 0.857           | 68.2           | 23.7           | 5.7            | 2.4            |                |
| 5-class          | -25 054.2      | 27         | 50 306.5 | 0.849   | 0.261            | <0.001        | 0.845           | 65.6           | 24.7           | 6.3            | 2.4            | 0.9            |
| <b>Cubic</b>     |                |            |          |         |                  |               |                 |                |                |                |                |                |
| 1-class          | -27 158.9      | 12         | 54 405.9 | NA      | NA               | NA            | NA              | 100.0          |                |                |                |                |
| 2-class          | -25 933.7      | 17         | 51 992.3 | 0.930   | 0.051            | <0.001        | 0.949           | 87.6           | 12.4           |                |                |                |
| 3-class          | -25 558.4      | 22         | 51 278.4 | 0.822   | 0.406            | <0.001        | 0.870           | 71.2           | 21.8           | 7.0            |                |                |
| 4-class          | -25 211.0      | 27         | 50 620.1 | 0.844   | 0.343            | <0.001        | 0.855           | 68.6           | 22.1           | 6.1            | 3.2            |                |
| 5-class          | -24 972.6      | 32         | 50 180.0 | 0.860   | 0.217            | <0.001        | 0.851           | 66.6           | 23.5           | 5.9            | 3.1            | 0.8            |

Abbreviations: APP, average posterior probability; BIC, Bayesian information criteria; LMR-LRT, Lo-Mendell-Rubin likelihood ratio test; NA, not available.
