# Supplementary material for: Data-driven long-term glycaemic control trajectories and their associated health and economic outcomes in Finnish patients with incident type 2 diabetes
Source: PubMed Central journal article supplement (PMC9159579; doi:10.1371/journal.pone.0269245), 2022-06-01
Supplement: pone.0269245.s004.pdf [file pone.0269245.s004.pdf]

**S4 Table.** Antidiabetic medication use (%) by the trajectories after the T2D diagnosis.

|                                               | 1st year | 2nd year | 3rd year | 4th year | 5th year | 6th year | 7th year |
|-----------------------------------------------|----------|----------|----------|----------|----------|----------|----------|
| <b>Metformin</b>                              |          |          |          |          |          |          |          |
| Stable, adequate                              | 42.2     | 44.3     | 44.7     | 44.9     | 46.2     | 47.3     | 48.2     |
| Slowly deteriorating                          | 62.9     | 63.1     | 65.3     | 66.8     | 68.6     | 67.2     | 68.1     |
| Rapidly deteriorating                         | 67.4     | 58.7     | 59.3     | 56.0     | 55.0     | 56.2     | 58.6     |
| Late diagnosed                                | 61.7     | 65.2     | 65.9     | 65.1     | 64.1     | 65.7     | 56.3     |
| <b>Sulfonylureas</b>                          |          |          |          |          |          |          |          |
| Stable, adequate                              | 0.5      | 0.4      | 0.4      | 0.3      | 0.3      | 0.3      | 0.3      |
| Slowly deteriorating                          | 2.1      | 2.4      | 1.2      | 1.2      | 1.6      | 1.4      | 1.4      |
| Rapidly deteriorating                         | 1.1      | 1.1      | 1.1      | 1.2      | 1.3      | 2.7      | 0.0      |
| Late diagnosed                                | 4.3      | 2.2      | 0        | 2.3      | 2.6      | 2.9      | 3.1      |
| <b>Combinations of oral BG lowering drugs</b> |          |          |          |          |          |          |          |
| Stable, adequate                              | 1.2      | 1.1      | 1.5      | 1.7      | 1.8      | 2.0      | 2.2      |
| Slowly deteriorating                          | 1.2      | 1.5      | 3.3      | 5.0      | 7.1      | 8.4      | 10.6     |
| Rapidly deteriorating                         | 3.2      | 5.4      | 7.7      | 9.5      | 7.5      | 9.6      | 14.3     |
| Late diagnosed                                | 6.4      | 6.5      | 9.1      | 9.3      | 10.3     | 20.0     | 21.9     |
| <b>Glitazones</b>                             |          |          |          |          |          |          |          |
| Stable, adequate                              | 0.0      | 0.1      | 0.1      | 0.0      | 0.0      | 0.0      | 0.0      |
| Slowly deteriorating                          | 0.0      | 0.0      | 0.3      | 0.3      | 0.3      | 0.3      | 0.4      |
| Rapidly deteriorating                         | 1.1      | 1.1      | 1.1      | 2.4      | 1.3      | 1.4      | 2.9      |
| Late diagnosed                                | 0.0      | 0.0      | 0.0      | 0.0      | 0.0      | 0.0      | 0.0      |
| <b>DPP-4 inhibitors</b>                       |          |          |          |          |          |          |          |
| Stable, adequate                              | 4.3      | 5.0      | 5.9      | 6.7      | 7.9      | 8.8      | 9.3      |
| Slowly deteriorating                          | 11.8     | 17.4     | 22.4     | 27.0     | 33.3     | 34.8     | 39.0     |
| Rapidly deteriorating                         | 34.7     | 28.3     | 30.8     | 39.3     | 48.8     | 47.9     | 41.4     |
| Late diagnosed                                | 17.0     | 32.6     | 36.4     | 30.2     | 38.5     | 40.0     | 46.9     |
| <b>Glinides</b>                               |          |          |          |          |          |          |          |
| Stable, adequate                              | 0.2      | 0.2      | 0.2      | 0.6      | 0.3      | 0.0      | 0.0      |
| Slowly deteriorating                          | 0.3      | 0.3      | 0.6      | 0.9      | 3.5      | 1.0      | 1.1      |
| Rapidly deteriorating                         | 0.0      | 1.1      | 3.3      | 3.6      | 6.3      | 1.4      | 0.0      |
| Late diagnosed                                | 2.1      | 6.5      | 9.1      | 7.0      | 7.7      | 2.9      | 3.1      |
| <b>GLP-1 analogues</b>                        |          |          |          |          |          |          |          |
| Stable, adequate                              | 0.0      | 0.0      | 0.0      | 0.1      | 0.3      | 0.3      | 0.5      |
| Slowly deteriorating                          | 0.0      | 0.0      | 0.0      | 0.0      | 0.3      | 2.0      | 4.3      |
| Rapidly deteriorating                         | 0.0      | 0.0      | 0.0      | 1.2      | 7.5      | 8.2      | 11.4     |
| Late diagnosed                                | 0.0      | 0.0      | 0.0      | 0        | 7.7      | 8.6      | 3.1      |
| <b>SGLT2 inhibitors</b>                       |          |          |          |          |          |          |          |
| Stable, adequate                              | 0.0      | 0.0      | 0.0      | 0.1      | 1.0      | 2.0      | 3.4      |
| Slowly deteriorating                          | 0.0      | 0.0      | 0.0      | 0.9      | 7.1      | 17.9     | 25.9     |
| Rapidly deteriorating                         | 0.0      | 0.0      | 0.0      | 0        | 8.8      | 35.6     | 34.3     |
| Late diagnosed                                | 0.0      | 0.0      | 0.0      | 0        | 5.1      | 11.4     | 15.6     |
| <b>Insulin</b>                                |          |          |          |          |          |          |          |
| Stable, adequate                              | 1.1      | 1.1      | 1.3      | 0.8      | 1.3      | 1.2      | 1.2      |
| Slowly deteriorating                          | 5.0      | 5.6      | 6.9      | 8.1      | 9.0      | 10.5     | 11.7     |
| Rapidly deteriorating                         | 20.0     | 22.8     | 24.2     | 29.8     | 37.5     | 43.8     | 48.6     |
| Late diagnosed                                | 48.9     | 43.5     | 43.2     | 48.8     | 46.2     | 37.1     | 37.5     |

Abbreviations: BG, blood glucose; DPP-4, dipeptidyl peptidase 4; GLP-1, glucagon-like peptide-1; SGLT2, sodium/glucose cotransporter 2; T2D, type 2 diabetes.
