# Supplementary material for: Data-driven long-term glycaemic control trajectories and their associated health and economic outcomes in Finnish patients with incident type 2 diabetes
Source: PubMed Central journal article supplement (PMC9159579; doi:10.1371/journal.pone.0269245), 2022-06-01
Supplement: pone.0269245.s005.pdf [file pone.0269245.s005.pdf]

**S5 Table.** Associations between the estimated HbA1c trajectories and incidence of deaths and diabetes complications.

|                                               | Events (%) | Events/100 person-years (95% CI) | Unadjusted HR (95% CI) | Age- and sex-adjusted HR (95% CI) | Fully adjusted <sup>a</sup> HR (95% CI) |
|-----------------------------------------------|------------|----------------------------------|------------------------|-----------------------------------|-----------------------------------------|
| <b>All-cause death</b>                        |            |                                  |                        |                                   |                                         |
| Stable, adequate glycaemic control            | 128 (12.1) | 2.20 (1.85–2.61)                 | 1.00 (reference)       | 1.00 (reference)                  | 1.00 (reference)                        |
| Slowly deteriorating glycaemic control        | 61 (17.9)  | 3.16 (2.44–4.03)                 | 1.42 (1.04–1.92)       | 1.30 (0.96–1.77)                  | 1.24 (0.91–1.69)                        |
| Rapidly deteriorating glycaemic control       | 24 (25.3)  | 4.70 (3.08–6.89)                 | 2.14 (1.38–3.31)       | 2.58 (1.67–3.99)                  | 2.49 (1.61–3.87)                        |
| Late diagnosed patients                       | 13 (27.7)  | 5.21 (2.89–8.67)                 | 2.38 (1.34–4.20)       | 3.33 (1.88–5.90)                  | 2.86 (1.60–5.12)                        |
| <b>Micro- and macrovascular complications</b> |            |                                  |                        |                                   |                                         |
| Stable, adequate glycaemic control            | 189 (17.9) | 3.49 (3.01–4.01)                 | 1.00 (reference)       | 1.00 (reference)                  | 1.00 (reference)                        |
| Slowly deteriorating glycaemic control        | 88 (25.9)  | 5.07 (4.08–6.22)                 | 1.44 (1.11–1.85)       | 1.37 (1.07–1.77)                  | 1.39 (1.08–1.79)                        |
| Rapidly deteriorating glycaemic control       | 26 (27.4)  | 5.50 (3.61–8.07)                 | 1.73 (1.15–2.61)       | 2.12 (1.41–3.20)                  | 2.28 (1.51–3.46)                        |
| Late diagnosed patients                       | 15 (31.9)  | 7.32 (4.25–11.8)                 | 2.08 (1.23–3.51)       | 2.68 (1.58–4.55)                  | 3.35 (1.96–5.72)                        |
| <b>Microvascular complications</b>            |            |                                  |                        |                                   |                                         |
| Stable, adequate glycaemic control            | 62 (5.9)   | 1.06 (0.81–1.35)                 | 1.00 (reference)       | 1.00 (reference)                  | 1.00 (reference)                        |
| Slowly deteriorating glycaemic control        | 39 (11.5)  | 2.09 (1.50–2.84)                 | 1.94 (1.30–2.89)       | 1.91 (1.28–2.84)                  | 2.00 (1.34–2.99)                        |
| Rapidly deteriorating glycaemic control       | 16 (16.8)  | 3.04 (1.73–4.98)                 | 3.23 (1.86–5.59)       | 3.60 (2.07–6.26)                  | 3.68 (2.11–6.43)                        |
| Late diagnosed patients                       | 8 (17.0)   | 3.55 (1.65–6.75)                 | 3.20 (1.53–6.68)       | 3.58 (1.71–7.50)                  | 4.46 (2.10–9.47)                        |
| <b>Macrovascular complications</b>            |            |                                  |                        |                                   |                                         |
| Stable, adequate glycaemic control            | 147 (13.9) | 2.69 (2.28–3.15)                 | 1.00 (reference)       | 1.00 (reference)                  | 1.00 (reference)                        |
| Slowly deteriorating glycaemic control        | 63 (18.5)  | 3.49 (2.70–4.43)                 | 1.27 (0.95–1.71)       | 1.19 (0.88–1.60)                  | 1.20 (0.89–1.62)                        |
| Rapidly deteriorating glycaemic control       | 16 (16.8)  | 3.36 (1.99–5.33)                 | 1.25 (0.74–2.09)       | 1.53 (0.91–2.57)                  | 1.62 (0.97–2.72)                        |
| Late diagnosed patients                       | 11 (23.4)  | 4.95 (2.61–8.61)                 | 1.85 (1.00–3.41)       | 2.56 (1.38–4.73)                  | 3.18 (1.71–5.94)                        |

Abbreviations: CI, confidence interval; HR, hazard ratio.

<sup>a</sup>Adjusted for age, sex, concordant diseases, discordant diseases, microvascular and macrovascular comorbidities at baseline.
