# Supplementary material for: Data-driven long-term glycaemic control trajectories and their associated health and economic outcomes in Finnish patients with incident type 2 diabetes
Source: PubMed Central journal article supplement (PMC9159579; doi:10.1371/journal.pone.0269245), 2022-06-01
Supplement: pone.0269245.s006.pdf [file pone.0269245.s006.pdf]

**S6 Table.** Average accumulated 4-year per-person healthcare costs (euros, €) by HbA1c trajectories in 2014–2017. All the costs are adjusted for censoring due to death utilizing Kaplan-Meier sample average estimator.

| Trajectory                                      | Stable, adequate glycaemic control | Slowly deteriorating glycaemic control | Rapidly deteriorating glycaemic control | Late diagnosed patients |
|-------------------------------------------------|------------------------------------|----------------------------------------|-----------------------------------------|-------------------------|
| <b>n (%), alive on Jan 1, 2014</b>              | 1032 (68.7)                        | 335 (22.1)                             | 90 (6.2)                                | 44 (3.1)                |
| <b>Accumulated total costs</b>                  | 15 341                             | 19 229                                 | 16 284                                  | 17 987                  |
| 1. Accumulated social- and healthcare costs     | 12 124                             | 15 312                                 | 11 952                                  | 13 358                  |
| <b>i) Primary healthcare costs</b>              | 3006                               | 3610                                   | 3457                                    | 2465                    |
| -Outpatient visits                              | 1659                               | 1713                                   | 1724                                    | 1022                    |
| -Inpatient visits                               | 1347                               | 1897                                   | 1732                                    | 1442                    |
| <b>ii) Specialized healthcare costs</b>         | 4543                               | 5323                                   | 4589                                    | 3005                    |
| -Outpatient visits                              | 1920                               | 1820                                   | 1476                                    | 881                     |
| -Inpatient visits                               | 2622                               | 3503                                   | 3113                                    | 2124                    |
| <b>iii) Nursing home care costs</b>             | 1200                               | 2946                                   | 782                                     | 437                     |
| <b>iv) Home care costs</b>                      | 3376                               | 3433                                   | 3124                                    | 7451                    |
| 2. Accumulated medication costs                 | 3216                               | 3917                                   | 4333                                    | 4629                    |
| <b>i) Accumulated diabetes medication costs</b> | 363                                | 1163                                   | 2433                                    | 2396                    |
